# Supplementary material for: Soil Microbial and Organic Carbon Legacies of Pre-Existing Plants Drive Pioneer Tree Growth during Subalpine Forest Succession
Source: MDPI journal article supplement (doi:10.3390/f13071110), 2022-07-15
Supplement: s1 [file s1]

## Supplementary Material

**Figure S1** Relative abundance of dominant bacterial (a) and fungal (b) genera. PP, PF, RF, EQ and BP refer to the background (inoculum) soils of *Poa poophagorum*, *Potentilla fragarioides*, *Rhododendron fortunei*, *Enkianthus quinqueflorus*, and *Betula platyphylla*, respectively. CPP, CPF, CRF, CEQ, and CBP refer to the soil conditioned by the above species.

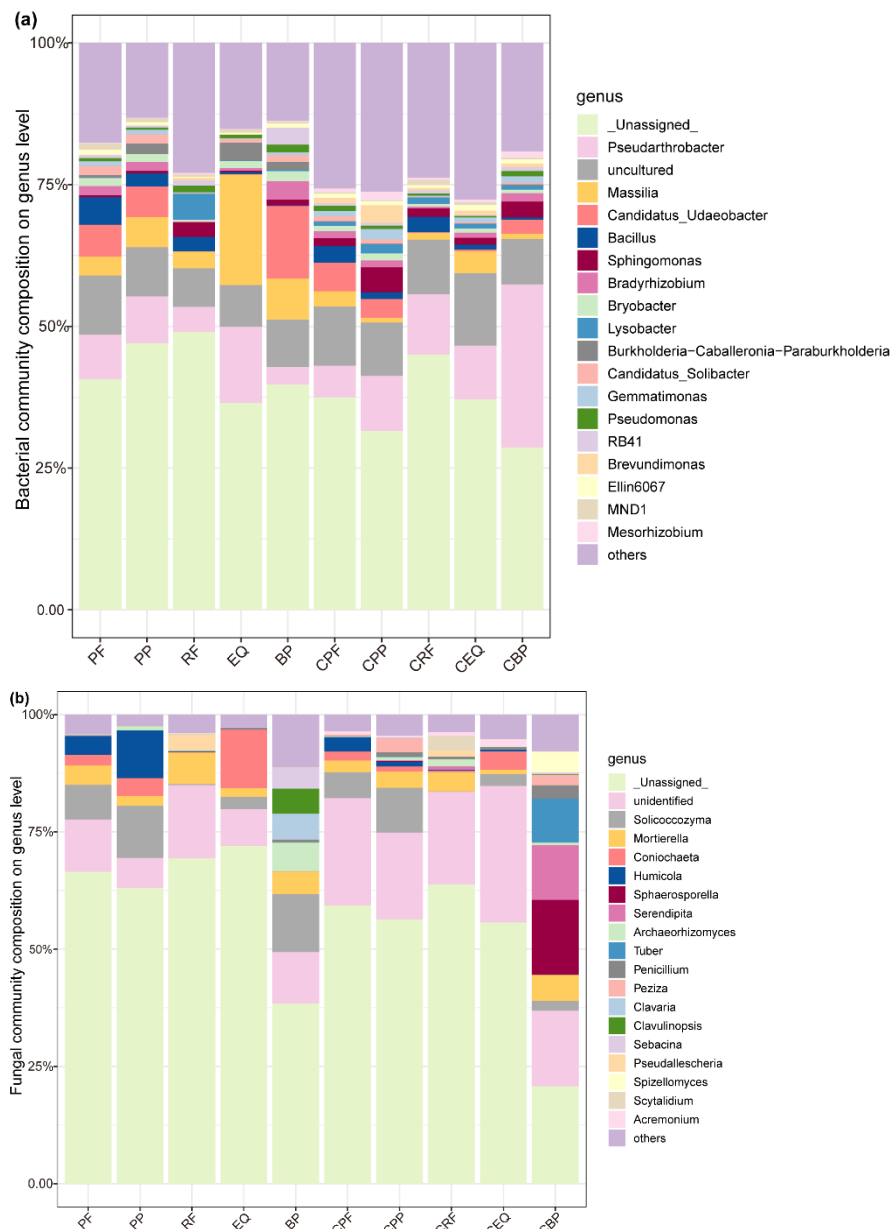

**Figure S2** Spearman correlation analysis between the relative abundance of soil fungal functional groups and seedling biomass. AP, soil available phosphorus;  $\text{NO}_3^-$ , soil nitrate nitrogen;  $\text{NH}_4^+$ , soil ammonium nitrogen; SOC, soil organic carbon; Biomass, total seedling biomass. Asterisks represents significant effects (\*,  $p < 0.05$ ; \*\*,  $p < 0.01$ ).

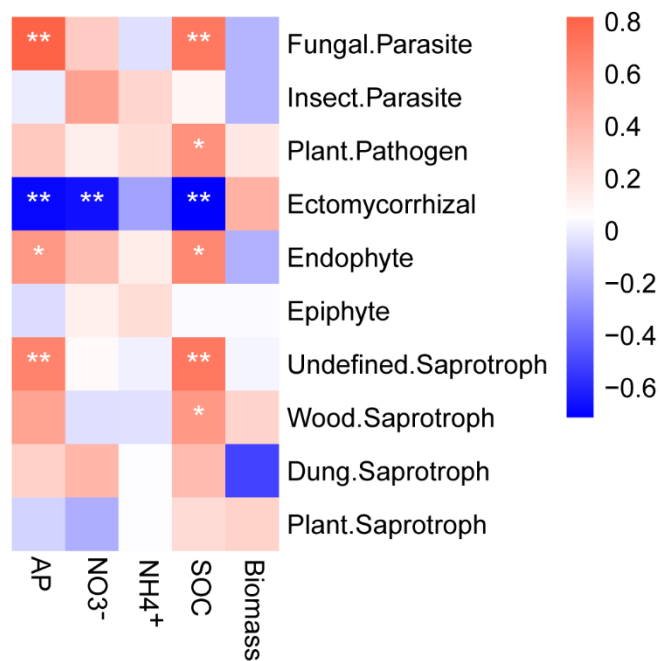

**Figure S3** Principal coordinates analysis of (a) bacterial and (b) fungal communities based on Bray–Curtis distances.

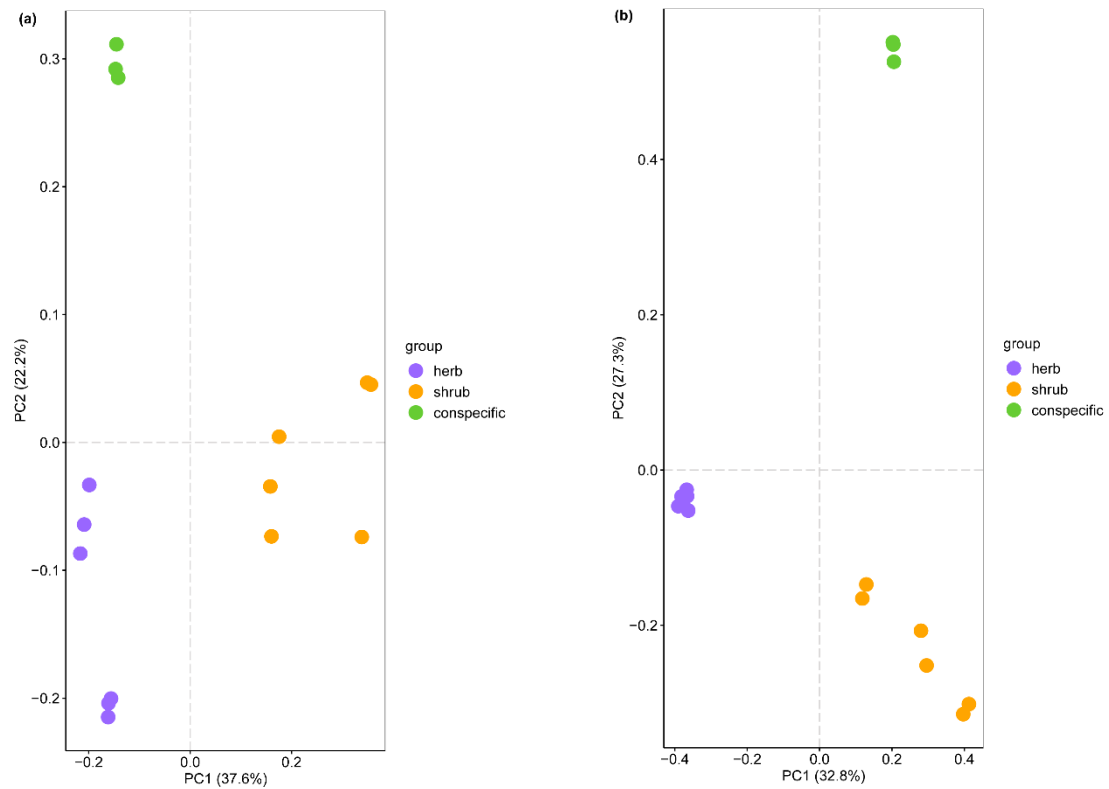

**Table S1** Sequence numbers of the dominant genera of ECM under different treatments.

| PF | PP | RF | EQ | BP   | CPF | CPP       | CRF | CEQ | CBP         | genus               |
|----|----|----|----|------|-----|-----------|-----|-----|-------------|---------------------|
| 5  | 3  | 0  | 43 | 9    | 5   | 19        | 21  | 31  | 597         | g__Hebeloma         |
| 2  | 2  | 0  | 0  | 1    | 0   | 5         | 2   | 0   | 614         | g__Pulvinula        |
| 0  | 2  | 0  | 0  | 0    | 0   | 2         | 0   | 0   | 37          | g__Geopora          |
| 3  | 2  | 0  | 0  | 3    | 2   | <b>42</b> | 0   | 0   | <b>4896</b> | g__Sphaerosporella  |
| 8  | 2  | 0  | 1  | 8    | 2   | 1         | 0   | 0   | 3           | g__Pseudotomentella |
| 12 | 2  | 0  | 2  | 420  | 1   | 3         | 0   | 0   | 27          | g__Russula          |
| 2  | 4  | 0  | 1  | 6    | 10  | 18        | 6   | 9   | 2970        | g__Tuber            |
| 1  | 1  | 0  | 0  | 1421 | 2   | 6         | 0   | 0   | 143         | g__Sebacina         |
| 1  | 0  | 0  | 7  | 4    | 2   | 0         | 1   | 0   | 14          | g__Clavulina        |
| 7  | 1  | 0  | 1  | 742  | 1   | 0         | 0   | 0   | 8           | g__Amphinema        |
| 0  | 1  | 0  | 0  | 362  | 0   | 8         | 0   | 0   | 28          | g__Tomentella       |
| 7  | 0  | 0  | 0  | 342  | 0   | 0         | 0   | 0   | 28          | g__Inocybe          |
| 1  | 0  | 0  | 0  | 46   | 0   | 0         | 0   | 0   | 2           | g__Xerocomus        |
| 2  | 0  | 0  | 0  | 0    | 0   | 0         | 0   | 0   | 48          | g__Efibulobasidium  |
| 0  | 0  | 0  | 0  | 0    | 0   | 2         | 0   | 0   | 179         | g__Naucoria         |
| 0  | 0  | 0  | 0  | 63   | 0   | 4         | 0   | 0   | 31          | g__Wilcoxina        |
| 0  | 0  | 0  | 0  | 101  | 0   | 0         | 0   | 0   | 1           | g__Laccaria         |
| 51 | 1  | 0  | 0  | 20   | 0   | 7         | 0   | 1   | 15          | g__Cortinarius      |
| 20 | 0  | 0  | 0  | 0    | 0   | 0         | 0   | 0   | 0           | g__Suillus          |
| 0  | 0  | 0  | 2  | 43   | 0   | 0         | 0   | 0   | 3           | g__Piloderma        |

Abbreviations are explained in Figure 1 and Figure S1.
